# Supplementary material for: Microemulsion-mediated solvothermal synthesis of nanosized CdS-sensitized TiO2 crystalline photocatalystElectronic supplementary information (ESI) available: UV-visible absorption spectra, XRD patterns and EPR spectrum. See http://www.rsc.org/suppdata/cc/b3/b302418k/
Source: Royal Society of Chemistry journal article supplement (doi:10.1039/b302418k), 2003-01-01
Supplement: b302418k.doc [file b302418k.doc]

Supporting information

Caption

Fig. 1. UV-visible absorption spectra of prepared samples, measured with Varian Cary 100 Scan UV-Visible system equipped with a Labsphere diffuse reflectance accessory

Fig. 2. XRD patterns of prepared samples (Δ anatase TiO2, * CdS cubic phase).

Fig. 3. EPR spectrum of anatase TiO2, irradiated for 20 min.

Fig. 1.

Fig. 2.

Fig. 3


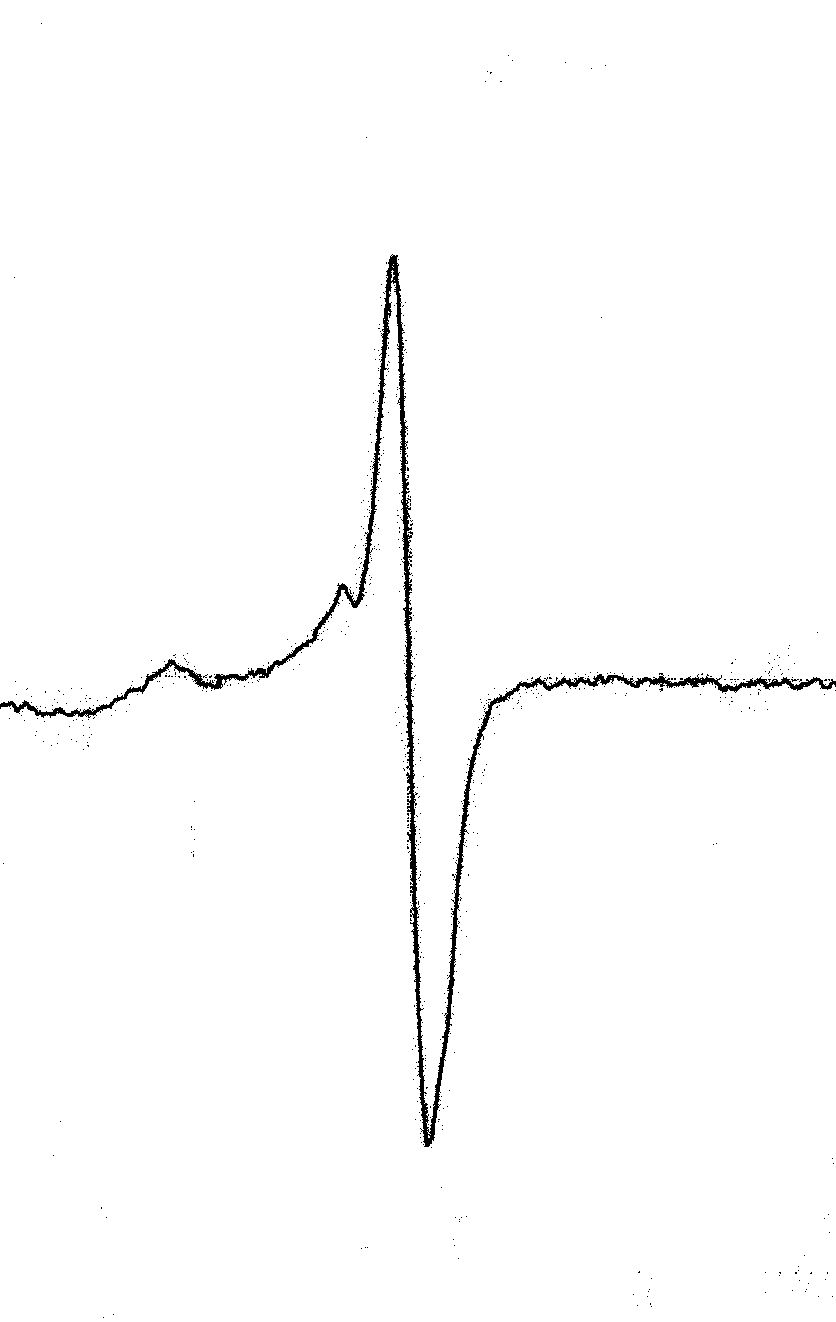


50 Gauss
